# Supplementary material for: Combined Therapy With Polyethylene Glycol‐20k and MCC950 Preserves Post‐Resuscitated Myocardial Function in a Rat Model of Cardiac Arrest and Cardiopulmonary Resuscitation
Source: PubMed Central journal article supplement — J Am Heart Assoc. 2021 Apr 22;10(9):e019177. doi: 10.1161/JAHA.120.019177 (PMC8200739; doi:10.1161/jaha.120.019177), 2021-04-22
Supplement: JAH3-10-e019177-s001.pdf [file JAH3-10-e019177-s001.pdf]

# **Supplemental Material**

**Figure S1. Experimental protocol.**

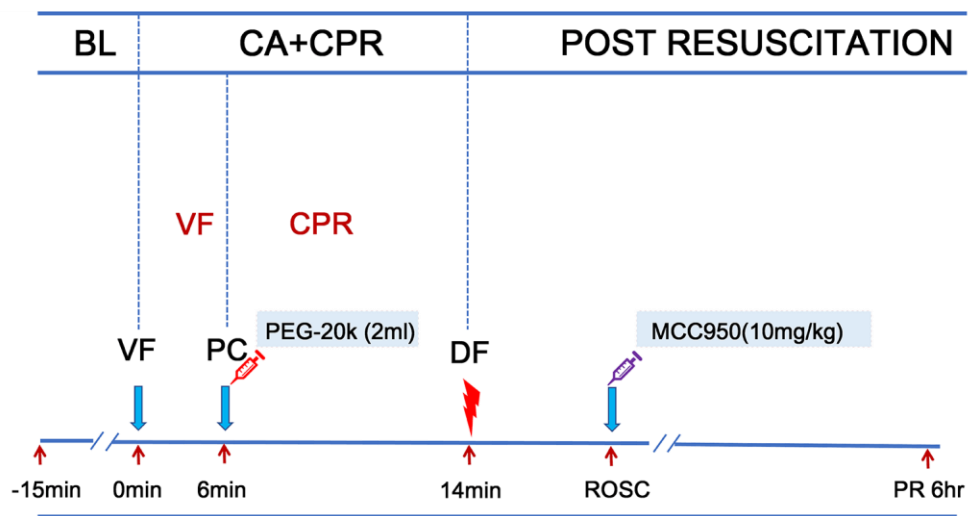

BL, baseline; VF, ventricular fibrillation; PC, precordial compression; CPR, cardiopulmonary resuscitation; DF, defibrillation; ROSC, return of spontaneous circulation; PR, post resuscitation.

**Figure S2. non-phosphorylating LEAK-respiration (CIL).**

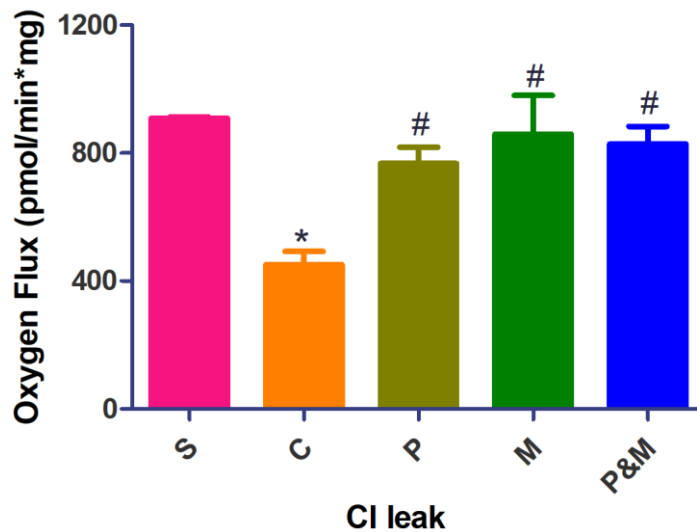

S, the sham group; C, the cardiac arrest control group; P, the PEG-20k group; M, the MCC950 group; P&M, the PEG20k+MCC950 group. \* $p < 0.05$  versus S, # $p < 0.05$  versus C, respectively. All statistical analysis was performed by one-way ANOVA, followed by Tukey's post-hoc analysis ( $n=6$  for each group). Each sample was measured in duplicate. Data are expressed as the mean $\pm$ SD.
